# Supplementary material
Source: PubMed Central journal article supplement (PMC6643476)
Supplement: ao6b00212_si_001.pdf [file ao6b00212_si_001.pdf]

**Title:**

Imidazoles induce reactive oxygen species in *Mycobacterium tuberculosis* which is not associated with cell death.

**Authors:**

Heather A. Howell Wescott<sup>1</sup>, David M. Roberts<sup>1</sup>, Christian L. Allebach<sup>1</sup>, Rachel Kokoczka<sup>1</sup> and Tanya Parish<sup>1\*</sup>

**Affiliations:**

<sup>1</sup>TB Discovery Research, Infectious Disease Research Institute, 1616 Eastlake Ave E, Suite 400, Seattle, WA 98102, USA

**Keywords**

Bactericidal, antibiotics, mycobacteria

\* Corresponding author

E-mail: tanya.parish@idri.org

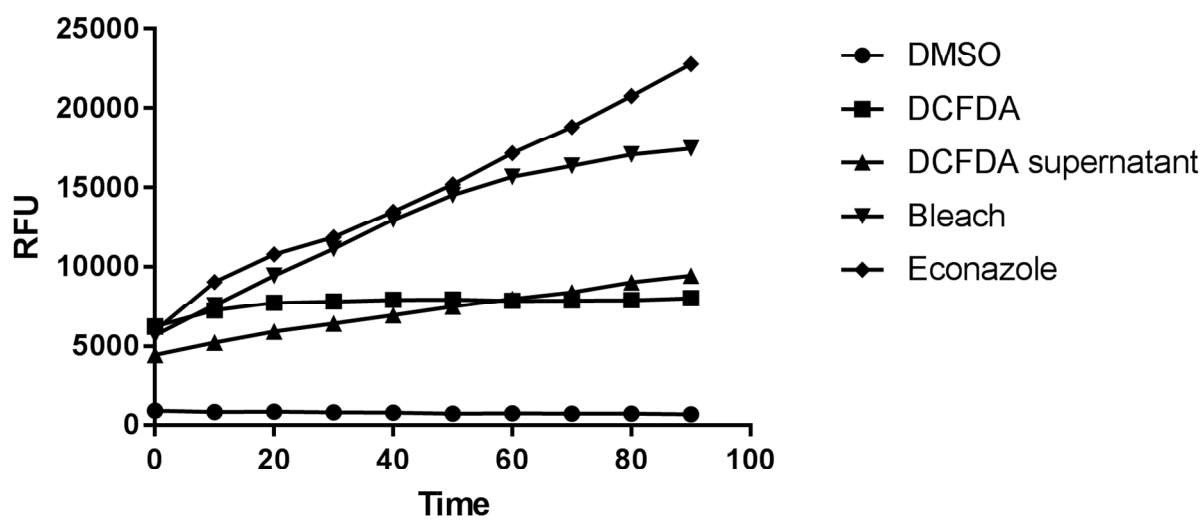

**Figure S1. Validation of DCFDA fluorescent probe for detection of ROS.** *M. tuberculosis* was loaded with DCFDA and incubated with 100  $\mu$ M bleach or econazole for 90 minutes and fluorescence measured. DMF was used as a negative control. Fluorescence of the supernatant of cells loaded with DCFDA was also measured to evaluate efflux of the probe from the cells.

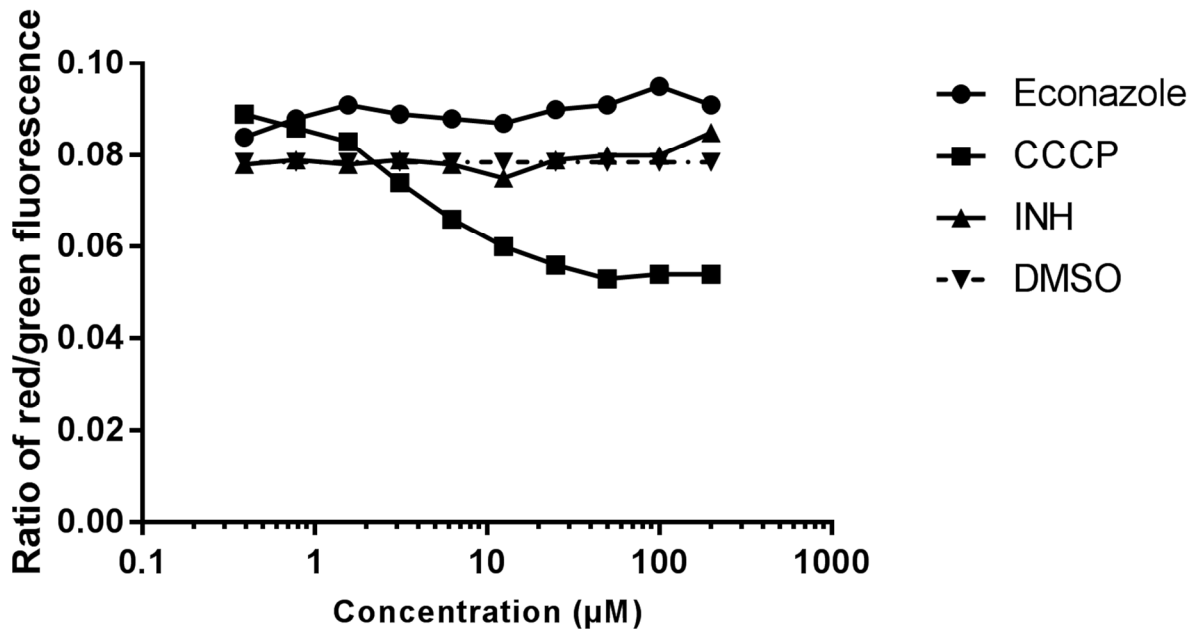

**Figure S2. Membrane potential of *M. tuberculosis* is unaffected by exposure to econazole.** A mid-log culture of *M. tuberculosis* was adjusted to an  $OD_{590} = 0.5$ , harvested by centrifugation, washed with 7H9-Tw and resuspended in 7H9-Tw containing 15  $\mu\text{M}$  3',3'-diethyloxycarbocyanine iodide ( $\text{DiOC}_2$ ). Bacteria were incubated at room temperature for 20 min, washed, and dispensed into black-walled clear bottom 96-well plates. Bacteria were exposed to econazole for 30 min and fluorescence measured at Ex485/Em530 and Ex485/Em610530. The ratio of red (Em610) to green (Em530) fluorescence was calculated. *Mtb* cells fluoresce green, but fluorescence shifts toward red emission as the dye molecules self-associate due to higher cytosolic concentrations caused by larger membrane potentials. CCCP was used as a positive control for disruption of membrane potential.

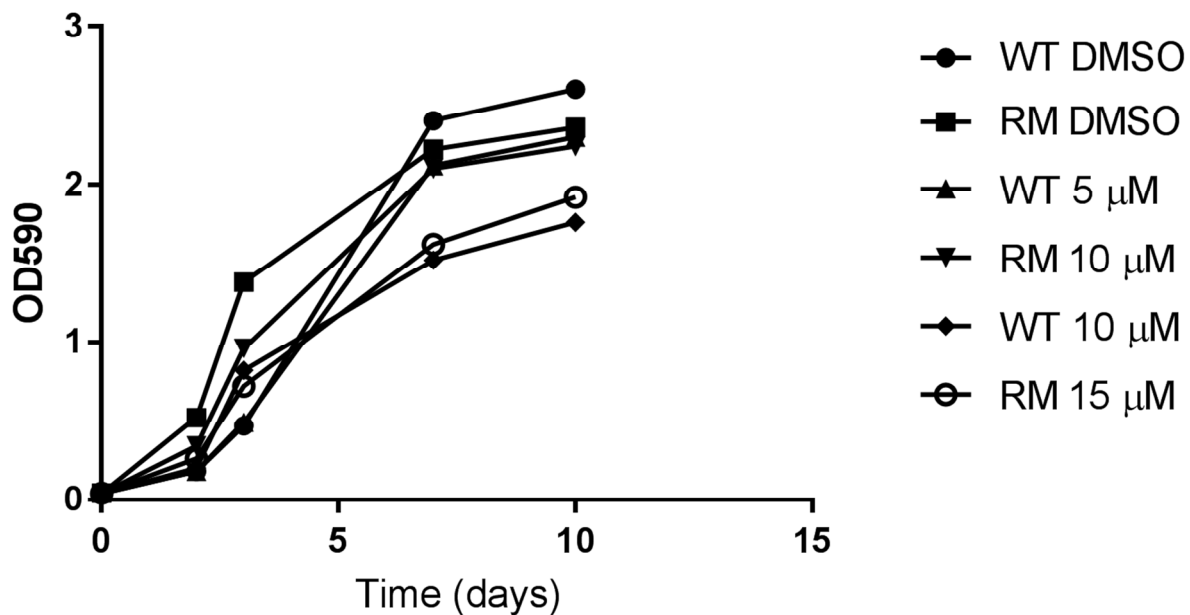

**Figure S3. Growth curves in presence of econazole in aerobic roller culture.** *M. tuberculosis* H37Rv wild-type and econazole-resistant mutant strains were grown in roller bottles for 10 days with the indicated concentrations of econazole. Concentrations were chosen for metabolomics analysis that resulted in a similar effect on growth of the cells over time (5 μM for WT vs. 10 μM for RM and 10 μM for WT vs. 15 μM RM).
